# Supplementary material for: Boosting the oxygen evolution reaction performance through defect and lattice distortion engineering
Source: Royal Society of Chemistry journal article supplement (doi:10.1039/d2nj00104g), 2022-01-01
Supplement: d2nj00104g1.pdf [file d2nj00104g1.pdf]

**Supporting information:**

**Boosting of Oxygen Evolution Reaction Performance through Defect  
and Lattice Distortion Engineering**

Zhijing Wu,<sup>a</sup> Jianwei Wang,<sup>a</sup> Haiyan Li,<sup>a</sup> Lixin Cao,<sup>\*a</sup> and Bohua Dong <sup>\*a</sup>

*<sup>a</sup>School of Materials Science and Engineering, Ocean University of China, 238*

*Songling Road, Qingdao, 266100 P. R. China.*

*\*Corresponding authors' Emails: caolixin@ouc.edu.cn (L. Cao) and  
dongbohua@ouc.edu.cn (B. Dong)*

**Faradic efficiency.** The evolved  $O_2$  was collected by a water-gas displacing method. The  $i$ - $t$  curve measured at the same time was integrated to get the cumulative charge ( $Q(C)$ ). The volume of  $O_2$  ( $V(mL)$ ) was calculated through the relation of  $V(mL)=Q(C)\times 22.4(L\ mol^{-1})\times 1000\div(F(C\ mol^{-1})\times 4)$ , where  $F$  means Faradic constant with a value of  $96485\ C\ mol^{-1}$ .

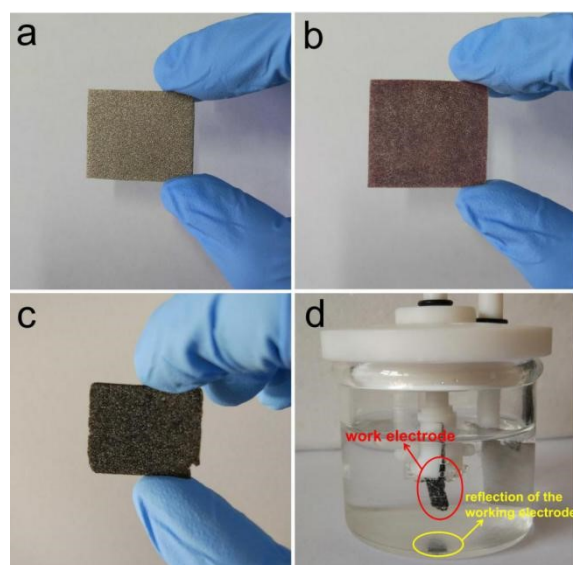

**Figure S1.** Digital images of a) bare NF, b)  $Co(OH)_2/NF$ , c) after high-heat sulfuration, d) electrolytic OER catalytic process

Figure S1 presents digital images of the bare Ni foam,  $Co(OH)_2/NF$ , after  $Co_9S_8/Ni_3S_2$  growth, and electrolytic OER catalytic process. The initial color of the Ni foam electrode was brown (Figure S1a), and NF is surrounded closely and uniformly by the  $Co(OH)_2$  (Figure S1b). After the  $Co_9S_8/Ni_3S_2$  had grown on the Ni foam substrate, the foam surface became completely black (Figure S1c). Seeing from the change of color, we can observe the uniform and complete formation of  $Co_9S_8/Ni_3S_2$  on the Ni foam, with no uncovered parts on the Ni foam substrate, which is further observed in the SEM images (Figure 2b). The uniform and complete morphology feature also have a tremendous effect on the performance of samples. Importantly, NF

can still maintain stability and mechanical property after high temperature annealing at 550°C in Figure S1c and d, which had been proved by the chronoamperometry and multi-step chronopotentiometric curve.

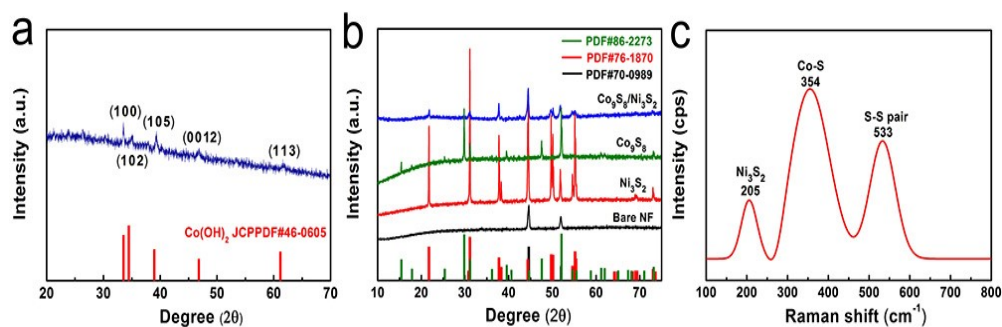

**Figure S2.** XRD patterns of a)  $\text{Co(OH)}_2$ , b) the bare NF,  $\text{Co}_9\text{S}_8$ ,  $\text{Ni}_3\text{S}_2$ //NF, and  $\text{Co}_9\text{S}_8/\text{Ni}_3\text{S}_2$  HNA//NF, c) Raman spectra of  $\text{Co}_9\text{S}_8/\text{Ni}_3\text{S}_2$  HNA//NF.

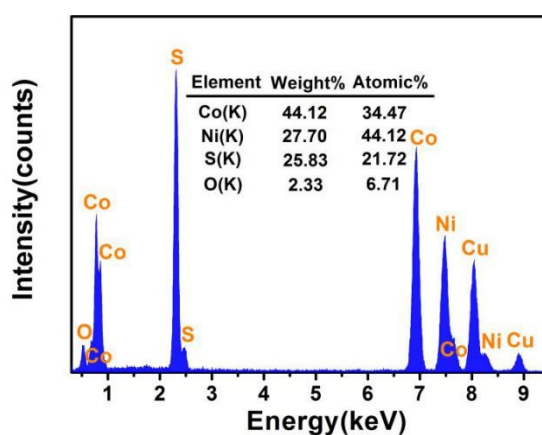

**Figure S3.** EDS spectrum of a single  $\text{Co}_9\text{S}_8/\text{Ni}_3\text{S}_2$  nanowire. The Cu peaks in the EDS spectrum come from the Cu grid as sample holder.

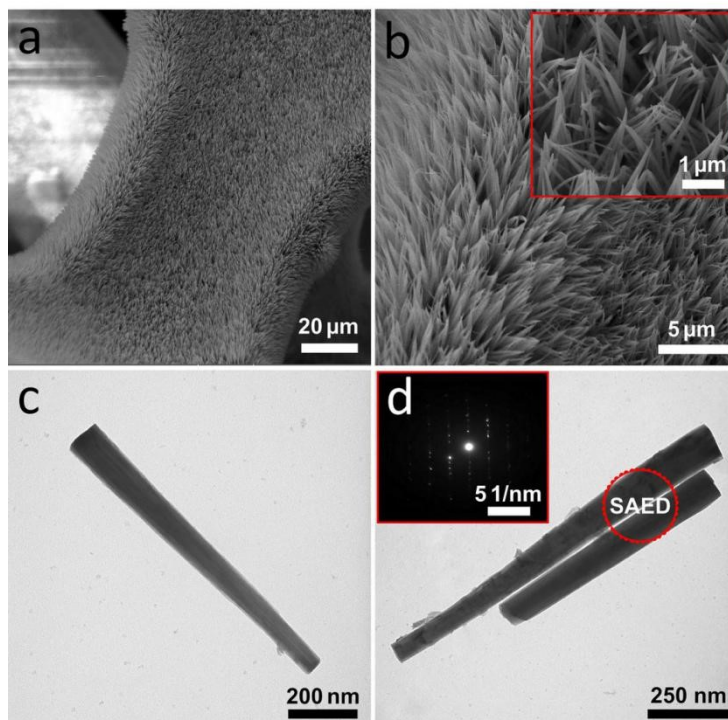

**Figure S4.** a,b) SEM images of  $\text{Co(OH)}_2$  nanowires, c,d) TEM images of  $\text{Co(OH)}_2$  nanowires. The inset is the selected-area electron diffraction (SAED) pattern of  $\text{Co(OH)}_2$  nanowires.

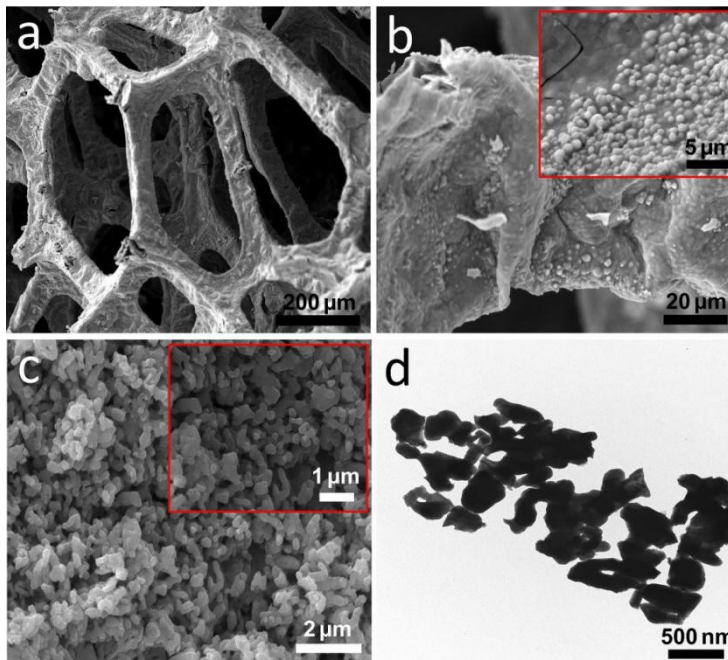

**Figure S5.** a,b) SEM images of  $\text{Ni}_3\text{S}_2/\text{NF}$ . c,d) SEM and TEM images of  $\text{Co}_9\text{S}_8$  powder respectively.

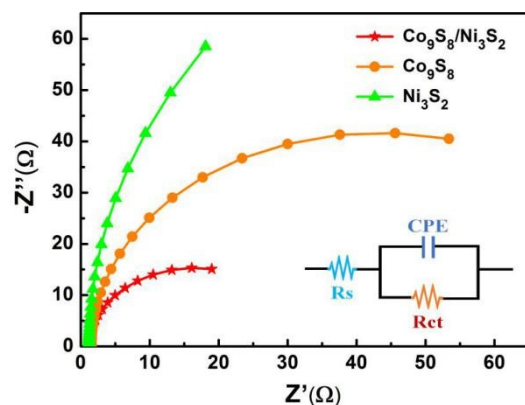

**Figure S6.** Nyquist plots of the  $\text{Co}_9\text{S}_8/\text{NF}$ ,  $\text{Ni}_3\text{S}_2/\text{NF}$ ,  $\text{Co}_9\text{S}_8/\text{Ni}_3\text{S}_2$  HNA//NF. The inset is the equivalent circuit model that contains the electrolyte resistance ( $R_s$ ), charge-transfer resistance ( $R_{ct}$ ) and constant phase element (CPE).

**Table S1.** Electrochemical impedance spectroscopy (EIS) fitting results for  $\text{Co}_9\text{S}_8/\text{Ni}_3\text{S}_2$  HNA//NF,  $\text{Co}_9\text{S}_8/\text{NF}$  and  $\text{Ni}_3\text{S}_2/\text{NF}$ .

| materials                                             | $R_s$ ( $\Omega$ ) | $R_{ct}$ ( $\Omega$ ) |
|-------------------------------------------------------|--------------------|-----------------------|
| $\text{Co}_9\text{S}_8/\text{Ni}_3\text{S}_2$ HNA//NF | 1.27               | 30                    |
| $\text{Co}_9\text{S}_8/\text{NF}$                     | 1.57               | 83                    |
| $\text{Ni}_3\text{S}_2/\text{NF}$                     | 1.19               | 219                   |

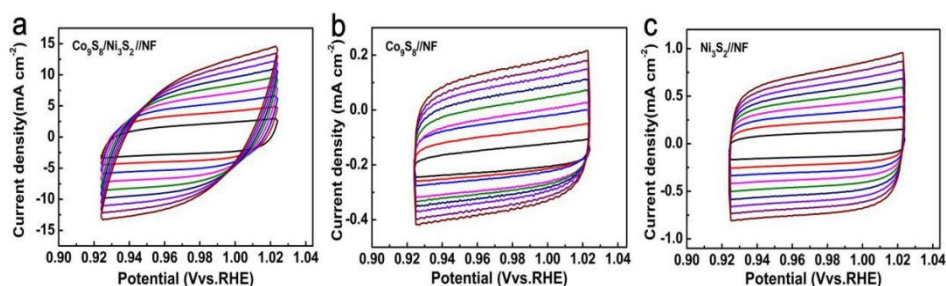

**Figure S7.** a,b,c) CV curves at different scan rates from 20, 40, 60 to 180  $\text{mV s}^{-1}$  of the  $\text{Co}_9\text{S}_8/\text{Ni}_3\text{S}_2$  HNA//NF,  $\text{Co}_9\text{S}_8/\text{NF}$ ,  $\text{Ni}_3\text{S}_2/\text{NF}$ , respectively.

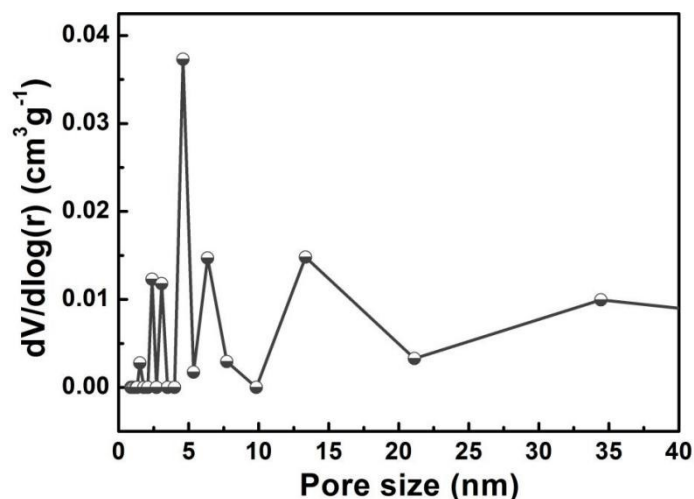

Figure S8. the BJH pore size distribution of the  $\text{Co}_9\text{S}_8/\text{Ni}_3\text{S}_2$  HNA.

Table S2. The theoretical values, measured values and the Faradaic efficiencies of the amount of  $\text{O}_2$  production at different periods.

| Time (min)                     | 10      | 20      | 30      | 40      | 50      | 60      |
|--------------------------------|---------|---------|---------|---------|---------|---------|
| Calculated $\text{O}_2$ (mmol) | 0.08036 | 0.16072 | 0.24108 | 0.31697 | 0.38393 | 0.45089 |
| Measured $\text{O}_2$ (mmol)   | 0.08000 | 0.15715 | 0.23126 | 0.30135 | 0.36608 | 0.42992 |
| Faradaic efficiency (%)        | 100     | 97.78   | 95.93   | 95.07   | 95.35   | 95.35   |
| Average (%)                    |         |         |         |         |         | 96.51   |

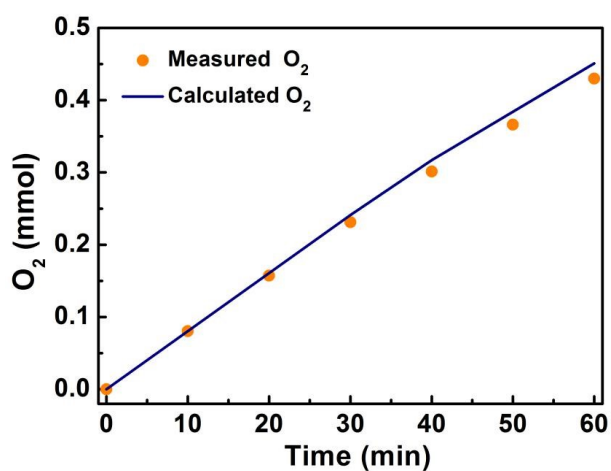

Figure S9. The experimental  $\text{O}_2$  production versus theoretical quantities for OER water splitting of  $\text{Co}_9\text{S}_8/\text{Ni}_3\text{S}_2$  HNA/NF at the constant current density.

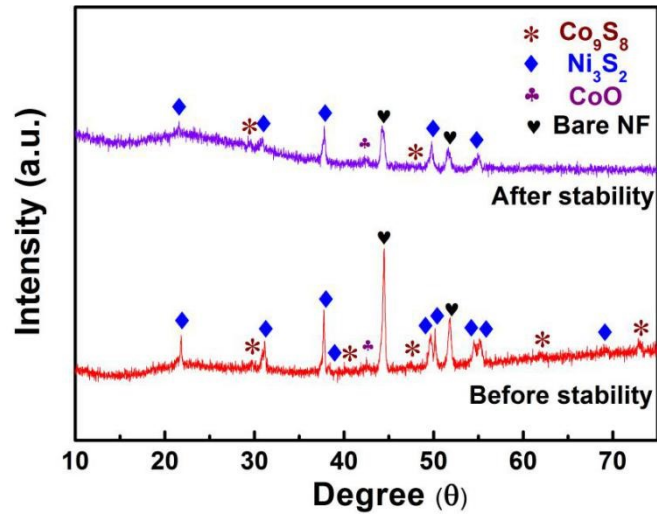

**Figure S10.** XRD patterns of  $\text{Co}_9\text{S}_8/\text{Ni}_3\text{S}_2$  HNA//NF before and after stability.

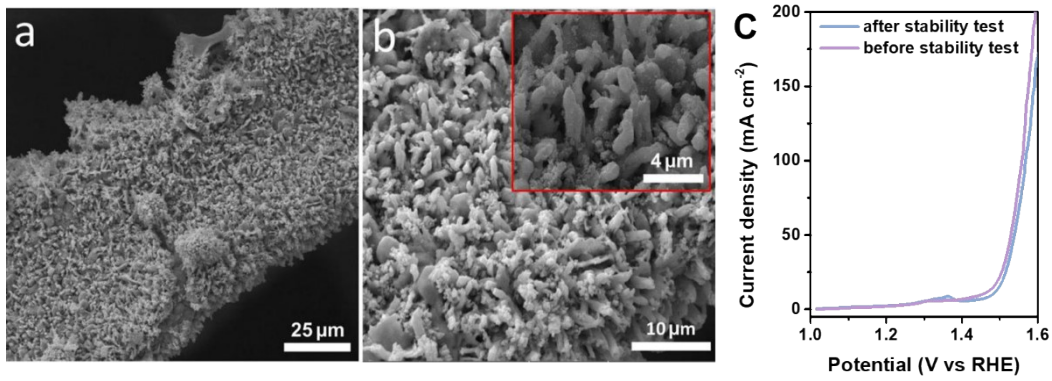

**Figure S11.** a, b) SEM images of  $\text{Co}_9\text{S}_8/\text{Ni}_3\text{S}_2$  HNA//NF after OER stability measurements. (c) OER polarization curves of  $\text{Co}_9\text{S}_8/\text{Ni}_3\text{S}_2$  HNA//NF before and after stability test.

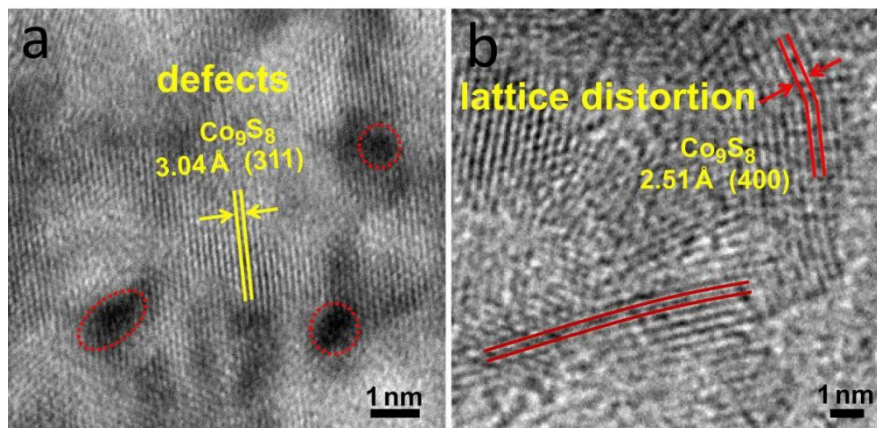

**Figure S12.** a, b) HRTEM images of  $\text{Co}_9\text{S}_8/\text{Ni}_3\text{S}_2$  HNA/NF after harsh OER.

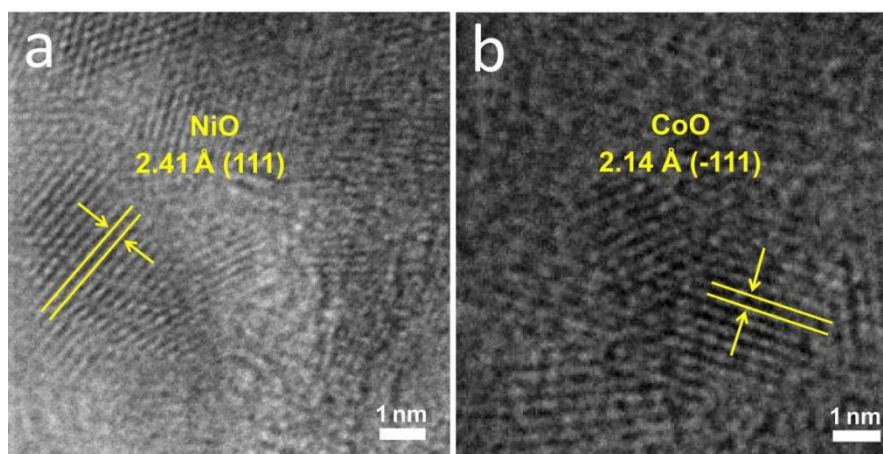

**Figure S13.** a, b) HRTEM images of  $\text{Co}_9\text{S}_8/\text{Ni}_3\text{S}_2$  HNA/NF after harsh OER.



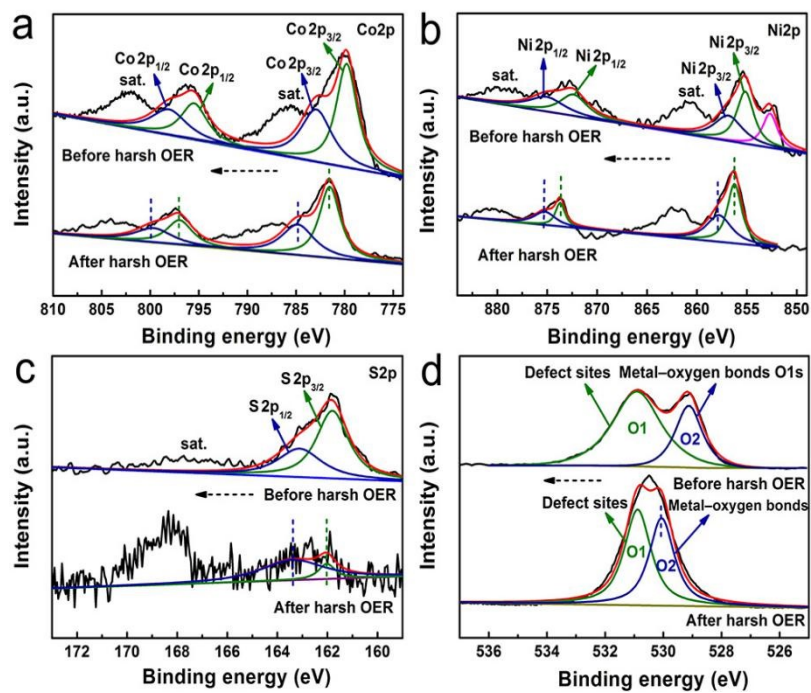

**Figure S14.** XPS spectra of a) Co 2p, b) Ni 2p, c) S 2p, and d) O 1s for Co<sub>9</sub>S<sub>8</sub>/Ni<sub>3</sub>S<sub>2</sub> HNA/NF before and after harsh OER (Sat. means shake-up satellites)

**Table S3.** Comparison of OER performance based on non-precious metal electrocatalysts in alkaline electrolytes.

| Materials                                                              | Electrolyte      | $\eta$ [mV] for $j_{\text{OER}} = 10 \text{ mA cm}^{-2}$ | Tafel slope [mV dec <sup>-1</sup> ] | References       |
|------------------------------------------------------------------------|------------------|----------------------------------------------------------|-------------------------------------|------------------|
| <b>Co<sub>9</sub>S<sub>8</sub>/Ni<sub>3</sub>S<sub>2</sub> HNA//NF</b> | <b>1.0 M KOH</b> | <b>223</b>                                               | <b>79</b>                           | <b>This work</b> |
| NiS <sub>2</sub> /CoS <sub>2</sub> -O NWs                              | 1.0 M KOH        | 235                                                      | 31                                  | 7                |
| <b>Co<sub>3</sub>O<sub>4</sub>/N-rmGO//NF</b>                          | 0.1 M KOH        | 310                                                      | 67                                  | 8                |
| NiCoP//NF                                                              | 1.0 M KOH        | 280                                                      | 87                                  | 10               |
| NiCo <sub>2</sub> S <sub>4</sub> NWs//NF                               | 1.0 M KOH        | 260                                                      | 40                                  | 38               |
| Ni <sub>2</sub> P NPs                                                  | 1.0 M KOH        | 290                                                      | 59                                  | S1               |
| Ni <sub>0.9</sub> Fe <sub>0.1</sub> /NC                                | 1.0 M KOH        | 330                                                      | 45                                  | S2               |
| Fe <sub>6</sub> Ni <sub>10</sub> O <sub>x</sub>                        | 1.0 M KOH        | 286                                                      | 48                                  | S3               |
| Fe <sub>0.1</sub> -NiS <sub>2</sub> NA//Ti                             | 1.0 M KOH        | $\eta_{100} = 231$                                       | 43                                  | S4               |
| NiCoP/C nanoboxes                                                      | 1.0 M KOH        | 330                                                      | 96                                  | S5               |
| Cu@CoS <sub>x</sub> //CF                                               | 1.0 M KOH        | 270                                                      | -                                   | S6               |
| NiCoP nanosheet                                                        | 1.0 M KOH        | $\eta_{50} = 310$                                        | 68.6                                | S7               |
| NiS//NF                                                                | 1.0 M KOH        | $\eta_{20} = 335$                                        | 89                                  | S8               |
| NiCo <sub>2</sub> S <sub>4</sub> NA//CC                                | 1.0 M KOH        | $\eta_{100} = 340$                                       | 89                                  | S9               |
| Co <sub>3</sub> O <sub>4</sub> @CoS//NF                                | 1.0 M KOH        | 290                                                      | 77.6                                | S10              |
| Ni(OH) <sub>2</sub> -TCNQ//CF                                          | 1.0 M KOH        | $\eta_{20} = 225$                                        | 110                                 | S11              |
| SnCoFe-Ar//NF                                                          | 1.0 M KOH        | 270                                                      | 42.3                                | S12              |
| Zn <sub>0.15</sub> Ni <sub>0.85</sub> Co <sub>2</sub> O <sub>4</sub>   | 0.1 M KOH        | 560                                                      | 62                                  | S13              |
| Co <sub>0.7</sub> Fe <sub>0.3</sub> P//CNT                             | 1.0 M KOH        | 243                                                      | 36                                  | S14              |
| Co-MOF nanosheet                                                       | 1.0 M KOH        | 263                                                      | 74                                  | S15              |
| NiMoO <sub>4-x</sub> /MoO <sub>2</sub>                                 | 1.0 M KOH        | 320                                                      | 69                                  | S16              |

## References

S1.Stern, L.-A.; Feng, L.; Song, F.; Hu, X., Ni<sub>2</sub>P as a Janus Catalyst for Water Splitting: the Oxygen Evolution Activity of Ni<sub>2</sub>P Nanoparticles. *Energy Environ. Sci.* 2015, 8, 2347-2351.

S2.Zhang, X.; Xu, H.; Li, X.; Li, Y.; Yang, T.; Liang, Y., Facile Synthesis of Nickel-Iron/Nanocarbon Hybrids as Advanced Electrocatalysts for Efficient Water Splitting. *ACS Catal.* 2016, 6, 580-588.

S3.Kuai, L.; Geng, J.; Chen, C.; Kan, E.; Liu, Y.; Wang, Q.; Geng, B., A Reliable Aerosol-Spray-Assisted Approach to Produce and Optimize Amorphous Metal Oxide Catalysts for Electrochemical Water Splitting. *Angew. Chem. Int. Ed.* 2014, 53, 7547-7551.

S4.Yang, N.; Tang, C.; Wang, K.; Du, G.; Asiri, A. M.; Sun, X., Iron-doped Nickel Disulfide Nanoarray: A Highly Efficient and Stable Electrocatalyst for Water Splitting. *Nano Res.* 2016, 9, 3346-3354.

S5.He, P.; Yu, X.-Y.; Lou, X. W., Carbon-Incorporated Nickel-Cobalt Mixed Metal Phosphide Nanoboxes with Enhanced Electrocatalytic Activity for Oxygen Evolution. *Angew. Chem. Int. Ed. Engl.* 2017, 56, 3897-3900.

S6.Liu, Y.; Li, Q.; Si, R.; Li, G.-D.; Li, W.; Liu, D.-P.; Wang, D.; Sun, L.; Zhang, Y.; Zou, X., Coupling Sub-Nanometric Copper Clusters with Quasi-Amorphous Cobalt Sulfide Yields Efficient and Robust Electrocatalysts for Water Splitting Reaction. *Adv. Mater.* 2017, 29, 1606200.

- S7.Li, Y.; Zhang, H.; Jiang, M.; Kuang, Y.; Sun, X.; Duan, X., Ternary NiCoP Nanosheet Arrays: An Excellent Bifunctional Catalyst for Alkaline Overall Water Splitting. *Nano Res.* 2016, 9, 2251-2259.
- S8.Zhu, W.; Yue, X.; Zhang, W.; Yu, S.; Zhang, Y.; Wang, J.; Wang, J., Nickel Sulfide Microsphere Film on Ni Foam as an Efficient Bifunctional Electrocatalyst for Overall Water Splitting. *Chem. Commun.* 2016, 52, 1486-1489.
- S9.Liu, D.; Lu, Q.; Luo, Y.; Sun, X.; Asiri, A. M., NiCo<sub>2</sub>S<sub>4</sub> Nanowires Array as an Efficient Bifunctional Electrocatalyst for Full Water Splitting with Superior Activity. *Nanoscale* 2015, 7, 15122-15126.
- S10.Zhou, J.; Dou, Y.; Zhou, A.; Guo, R.-M.; Zhao, M.-J.; Li, J.-R., MOF Template-Directed Fabrication of Hierarchically Structured Electrocatalysts for Efficient Oxygen Evolution Reaction. *Adv. Energy Mater.* 2017, 7, 1602643.
- S11.Guo, X.; Kong, R.-M.; Zhang, X.; Du, H.; Qu, F., Ni(OH)<sub>2</sub> Nanoparticles Embedded in Conductive Microrod Array: An Efficient and Durable Electrocatalyst for Alkaline Oxygen Evolution Reaction. *ACS Catal.* 2018, 8, 651-655.
- S12.Chen, D.; Qiao, M.; Lu, Y.-R.; Hao, L.; Liu, D.; Dong, C.-L.; Li, Y.; Wang, S., Preferential Cation Vacancies in Perovskite Hydroxide for the Oxygen Evolution Reaction. *Angew. Chem. Int. Ed.* 2018, 57, 8691-8696.
- S13.Yang, M.; Li, Y.; Yu, Y.; Liu, X.; Shi, Z.; Xing, Y., Self-Assembly of Three-Dimensional Zinc-Doped NiCo<sub>2</sub>O<sub>4</sub> as Efficient Electrocatalysts for Oxygen Evolution Reaction. *Chem. Eur. J* 2018, 24, 13002-13008.

S14.Zhang, X.; Zhang, X.; Xu, H.; Wu, Z.; Wang, H.; Liang, Y., Iron-Doped Cobalt Monophosphide Nanosheet/Carbon Nanotube Hybrids as Active and Stable Electrocatalysts for Water Splitting. *Adv. Funct. Mater.* 2017, 27, 1606635.

S15.Xu, Y.; Li, B.; Zheng, S.; Wu, P.; Zhan, J.; Xue, H.; Xu, Q.; Pang, H., Ultrathin Two-dimensional Cobalt–organic Framework Nanosheets for High-performance Electrocatalytic Oxygen Evolution. *J. Mater. Chem. A* 2018, 6, 22070-22076.

S16.Zhang, Z.; Ma, X.; Tang, J., Porous NiMoO<sub>4-x</sub>/MoO<sub>2</sub> Hybrids as Highly Effective Electrocatalysts for the Water Splitting Reaction. *J. Mater. Chem. A* 2018, 6, 12361-12369.
